# Supplementary material for: Regional Differences in Correlates of Daily Walking among Middle Age and Older Australian Rural Adults: Implications for Health Promotion
Source: MDPI journal article supplement (doi:10.3390/ijerph13010116), 2016-01-08

# Supplementary Materials: Regional Differences in Correlates of Daily Walking among Middle Age and Older Australian Rural Adults: Implications for Health Promotion

James Dollman, Melissa Hull, Nicole Lewis, Suzanne Carroll and Dorota Zarnowiecki

**Table S1.** Individual items and factors (including Cronbach  $\alpha$ 's) from the physical activity correlates questionnaire.

| Questionnaire Item   | Factors                                                                                                                                                                                                                                                                                                                                                                                                                                                                                                                                                                  | Response Option                                                                                                                                                                                                                                                    | Cronbach $\alpha$ |
|----------------------|--------------------------------------------------------------------------------------------------------------------------------------------------------------------------------------------------------------------------------------------------------------------------------------------------------------------------------------------------------------------------------------------------------------------------------------------------------------------------------------------------------------------------------------------------------------------------|--------------------------------------------------------------------------------------------------------------------------------------------------------------------------------------------------------------------------------------------------------------------|-------------------|
| <b>Demographic</b>   |                                                                                                                                                                                                                                                                                                                                                                                                                                                                                                                                                                          |                                                                                                                                                                                                                                                                    |                   |
| Education            | What is the highest level of education you have completed?                                                                                                                                                                                                                                                                                                                                                                                                                                                                                                               | Never attended school; Some primary school; Completed primary school; Some high school; Completed high school; Trade or trade certificate or diploma; University or tertiary institute degree; Higher University degree (e.g., Postgraduate diploma, Masters, PhD) | n/a               |
| Work Status          | Which of the following best describes your main daily activities and/or responsibilities?                                                                                                                                                                                                                                                                                                                                                                                                                                                                                | Employed full-time; Employed part-time; Self-employed; Unemployed; Home/duties and/or raising children full-time; Student; Retired; Unable to work; Don't know/unsure                                                                                              | n/a               |
| Marital status       | Which of the following best describes your current marital status?                                                                                                                                                                                                                                                                                                                                                                                                                                                                                                       | Married; Living with a partner; Separated; Divorced; Widowed; Never married; Don't know/unsure                                                                                                                                                                     | n/a               |
| Income               | Which of the following best describes how you manage on the income you have available?                                                                                                                                                                                                                                                                                                                                                                                                                                                                                   | It is impossible; It is difficult all the time; It is difficult some of the time; It is not too bad; It is easy; Don't know/unsure                                                                                                                                 | n/a               |
| <b>Biological</b>    |                                                                                                                                                                                                                                                                                                                                                                                                                                                                                                                                                                          |                                                                                                                                                                                                                                                                    |                   |
| General health       | What would you say is your general health?                                                                                                                                                                                                                                                                                                                                                                                                                                                                                                                               | Poor; Fair; Good; Very good; Excellent                                                                                                                                                                                                                             | n/a               |
| <b>Psychological</b> |                                                                                                                                                                                                                                                                                                                                                                                                                                                                                                                                                                          |                                                                                                                                                                                                                                                                    |                   |
| Motivation [29]      | <p>I'm good at keeping promises, especially the ones I make to myself.</p> <p>When I take on a difficult job, I make a point of sticking with it until it's completed.</p> <p>I have a lot of self-motivation.</p> <p>I'm good at making decisions and standing by them.</p> <p>I work harder than most of my friends.</p> <p>Sometimes I push myself harder than I should.</p> <p>I like to take on jobs that challenge me.</p> <p>Whenever I reach a goal, I set a higher one.</p> <p>I can persist in spite of failure.</p> <p>I have a strong desire to achieve.</p> | Very unlike me; Unlike me; Neither like or unlike me; Somewhat like me; Very much like me                                                                                                                                                                          | 0.75              |

Table S1. Cont.

| Questionnaire Item          | Factors                                                                                                                                                                                                                                                                                                                                                                                                                                                                                                                                                     | Response Option                                                                                      | Cronbach $\alpha$ |
|-----------------------------|-------------------------------------------------------------------------------------------------------------------------------------------------------------------------------------------------------------------------------------------------------------------------------------------------------------------------------------------------------------------------------------------------------------------------------------------------------------------------------------------------------------------------------------------------------------|------------------------------------------------------------------------------------------------------|-------------------|
| Barriers self-efficacy [30] | <p><i>How confident are you that you could do the following if you wanted to:</i></p> <p><i>Go for a walk for exercise regularly for the next 6 months;</i></p> <p><i>Be physically active in your leisure time even when tired;</i></p> <p><i>Be physically active in your leisure time even when in a bad mood;</i></p> <p><i>Be physically active in your leisure time even when you feel you don't have time;</i></p> <p><i>Be physically active in your leisure time even if you have no one to be active with.</i></p>                                | Not at all confident; Somewhat confident; Moderately confident; Very confident; Completely confident | 0.80              |
| Relapse self-efficacy [31]  | <p><i>If I have started to do physical activity regularly, I am confident that I can maintain it, even if I don't see immediate results.</i></p> <p><i>I am confident that I am able to resume regular physical activities, even if I had failed to maintain them a couple of times.</i></p> <p><i>I am confident that I can resume my physical activity, even when feeling weak after an illness.</i></p> <p><i>If I have started to do physical activity regularly, I am confident that I can maintain it, even if I don't see immediate results.</i></p> | Not at all confident; Somewhat confident; Moderately confident; Very confident; Completely confident | 0.93              |
| Health beliefs [32]         | No factor formed                                                                                                                                                                                                                                                                                                                                                                                                                                                                                                                                            |                                                                                                      | n/a               |
| Already active              | <i>I am doing sufficient regular exercise for good health.</i>                                                                                                                                                                                                                                                                                                                                                                                                                                                                                              | Strongly disagree; Somewhat disagree; Neutral; Somewhat agree; Strongly agree                        |                   |
| Bullet-proof                | <i>I take the attitude that I am "bullet-proof", so there is no need to look after my health.</i>                                                                                                                                                                                                                                                                                                                                                                                                                                                           |                                                                                                      |                   |
| Need a health scare         | <i>I need a health scare before I am inclined to change my exercise behaviour.</i>                                                                                                                                                                                                                                                                                                                                                                                                                                                                          |                                                                                                      |                   |
| Physical activity Important | <i>Being physically active for my health is important to me.</i>                                                                                                                                                                                                                                                                                                                                                                                                                                                                                            |                                                                                                      |                   |

Table S1. Cont.

| Questionnaire Item      | Factors                                                                                                                                                                          | Response Option                                                               | Cronbach $\alpha$ |
|-------------------------|----------------------------------------------------------------------------------------------------------------------------------------------------------------------------------|-------------------------------------------------------------------------------|-------------------|
| <b>Social</b>           |                                                                                                                                                                                  |                                                                               |                   |
| Need for support [33]   | <i>If I had someone like a friend or family member to exercise with, chances are that I would exercise more.</i>                                                                 | Strongly disagree; Somewhat disagree; Neutral; Somewhat agree; Strongly agree | 0.82              |
|                         | <i>I would maintain my regular exercise if my friends encouraged me to exercise.</i>                                                                                             |                                                                               |                   |
|                         | <i>I will maintain my regular exercise if my friends encourage me to exercise.</i>                                                                                               |                                                                               |                   |
| Others active           | <i>A lot of people in my neighbourhood are physically active.</i>                                                                                                                | Strongly disagree; Somewhat disagree; Neutral; Somewhat agree; Strongly agree | n/a               |
| <b>Environmental</b>    |                                                                                                                                                                                  |                                                                               |                   |
| Walkability [34]        | <i>Many shops, stores, markets or other places to buy things I need are within easy walking distance.</i>                                                                        | Strongly disagree; Somewhat disagree; Neutral; Somewhat agree; Strongly agree | 0.88              |
|                         | <i>There are footpaths on most of the streets in my neighbourhood.</i>                                                                                                           |                                                                               |                   |
|                         | <i>My neighbourhood offers many opportunities to be physically active.</i>                                                                                                       |                                                                               |                   |
|                         | <i>My neighbourhood has several free or low cost recreational facilities, such as parks, walking trails, bike paths, recreation centres, playgrounds, public swimming pools.</i> |                                                                               |                   |
|                         | <i>There are many interesting things to look at while walking in my neighbourhood.</i>                                                                                           |                                                                               |                   |
| Pleasant community [33] | <i>There are many places to be physically active in my community not including streets (e.g., parks, trails, playgrounds)</i>                                                    | Very pleasant; Somewhat pleasant; Not very pleasant; Not at all pleasant      | n/a               |
|                         | <i>Overall, how would you rate your community as a place to be physically active?</i>                                                                                            |                                                                               |                   |
| Neighbourhood risk [35] | <i>The crime rate in my neighbourhood makes it difficult or unpleasant to go on walks at nights.</i>                                                                             | Strongly disagree; Somewhat disagree; Neutral; Somewhat agree; Strongly agree | 0.71              |
|                         | <i>Traffic on the streets or roads that it makes it difficult or unpleasant to walk in my neighbourhood.</i>                                                                     |                                                                               |                   |

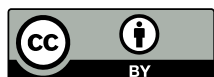

Supplement: s1 [file s1]
